# Supplementary material for: Cold-Inducible RNA-Binding Protein but Not Its Antisense lncRNA Is a Direct Negative Regulator of Angiogenesis In Vitro and In Vivo via Regulation of the 14q32 angiomiRs—microRNA-329-3p and microRNA-495-3p
Source: MDPI journal article supplement (doi:10.3390/ijms222312678), 2021-11-24
Supplement: s1 [file s1]

## Supplemental Figure S1

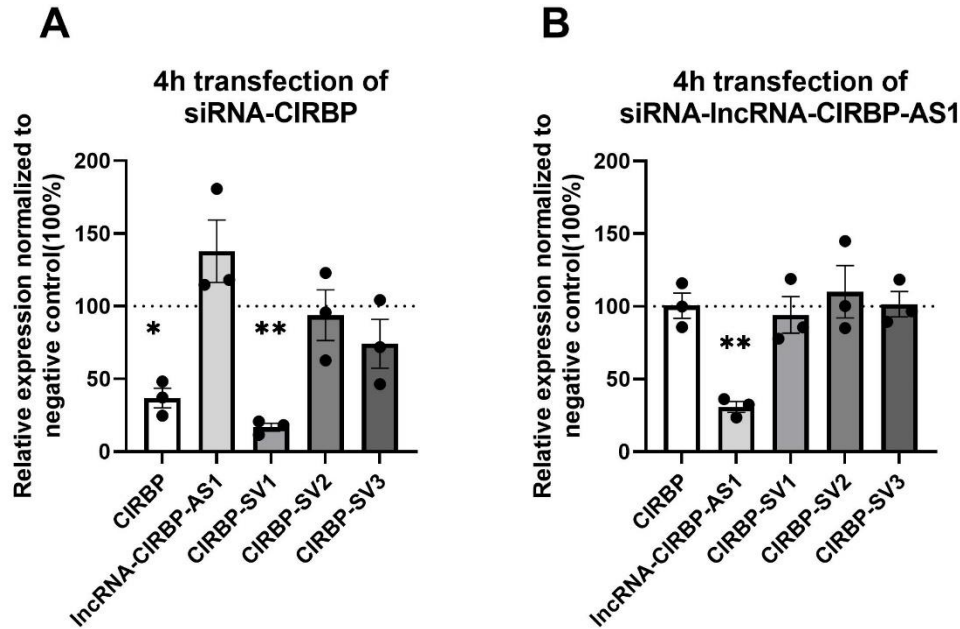

**Figure S1.** siRNA transfection for 4 hours in HUVECs. (A) Relative expression of total CIRBP, its splice variants, and lncRNA-CIRBP-AS1 after siRNA-CIRBP transfection, normalized to GAPDH. (B) Relative expression of total CIRBP, its splice variants, and lncRNA-CIRBP-AS1 after siRNA-lncRNA-CIRBP-AS1 transfection, normalized to GAPDH. Data show the percentage compared to the siRNA negative control group. Data are presented as mean  $\pm$  SEM, \* $p$  < 0.05, \*\* $p$  < 0.01, by one-sample t-tests (two-tail).
